# Supplementary material for: High temperature spin-polarized semiconductivity with zero magnetization in two-dimensional Janus MXenes
Source: Royal Society of Chemistry journal article supplement (doi:10.1039/c6tc01287f), 2016-01-01
Supplement: c6tc01287f1.pdf [file c6tc01287f1.pdf]

# Supporting Information “Two-dimensional Janus MXenes: High-temperature Spin-polarized Semiconductor with Zero Magnetization”

Junjie He,<sup>†</sup> Pengbo Lyu,<sup>†</sup> L. Z. Sun,<sup>\*,§</sup> Ángel Morales García<sup>†</sup> and Petr Nachtigall<sup>\*,†</sup>,

<sup>†</sup>*Department of Physical and Macromolecular  
Chemistry, Faculty of Science, Charles University in  
Prague, 128 43 Prague 2, Czech Republic*

<sup>§</sup>*Hunan Provincial Key laboratory of Thin Film Materials and Devices,  
School of Material Sciences and Engineering, Xiangtan University, Xiangtan 411105,  
China*

E-mail: [lz.sun@xtu.edu.cn](mailto:lz.sun@xtu.edu.cn), [petr.nachtigall@natur.cuni.cz](mailto:petr.nachtigall@natur.cuni.cz)

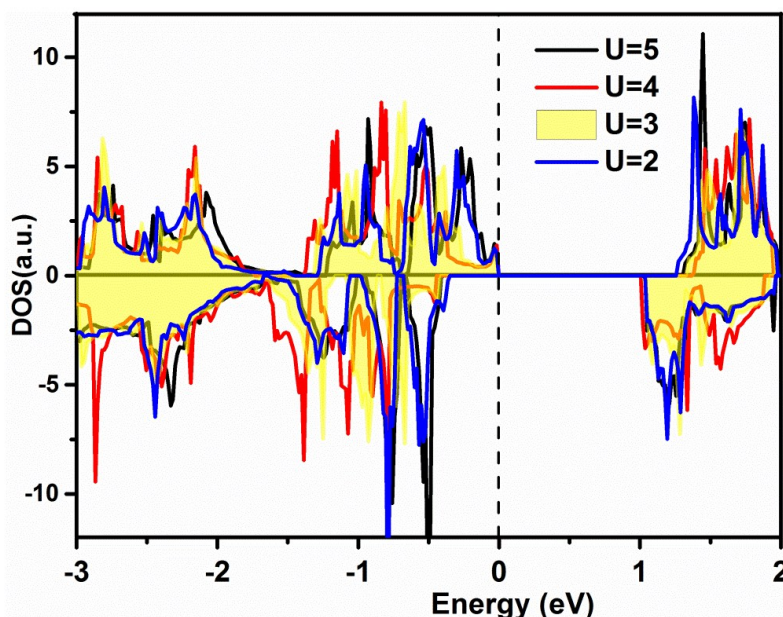

Fig. S1. The total DOS for Cr<sub>2</sub>CFCl with various U value

**Table S1:** Calculated characteristics of  $\text{Cr}_2\text{CX}_2$  materials.  $L$  is the lattice constant,  $E_{\text{ex1}}$  and  $E_{\text{ex2}}$  define the difference between  $E_{\text{Néel}}$  and  $E_{\text{FM}}$ ,  $E_{\text{Néel}}$  and  $E_{\text{zigzag}}$ , respectively. The  $J_1$  and  $J_2$  represent the nearest neighbor and next nearest neighbor couplings constants, respectively.

|    | $L$<br>(Å) | FM<br>(eV) | AFM2<br>(eV) | $J_1$<br>(meV) | $J_2$<br>(meV) |
|----|------------|------------|--------------|----------------|----------------|
| H  | 2.992      | 0.758      | 0.931        | -28.075        | 11.829         |
| F  | 3.10       | 0.666      | 0.467        | -24.654        | 0.643          |
| Cl | 3.269      | 0.588      | 1.160        | -21.786        | 21.316         |
| Br | 3.368      | 0.525      | 1.161        | -19.425        | 22.547         |
| OH | 3.121      | 0.663      | 0.441        | -24.542        | -0.019         |

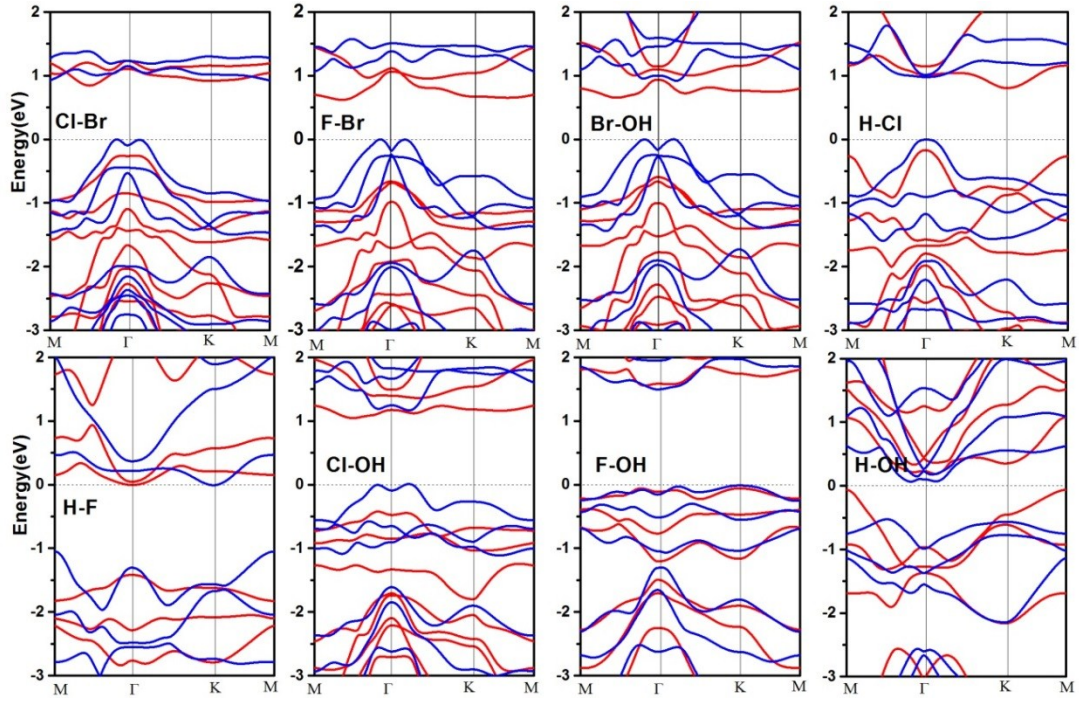

**Fig. S2.** The band structure for Janus  $\text{Cr}_2\text{CXX}'$ . Red and blue lines represent the spin-up and spin-down directions, respectively.

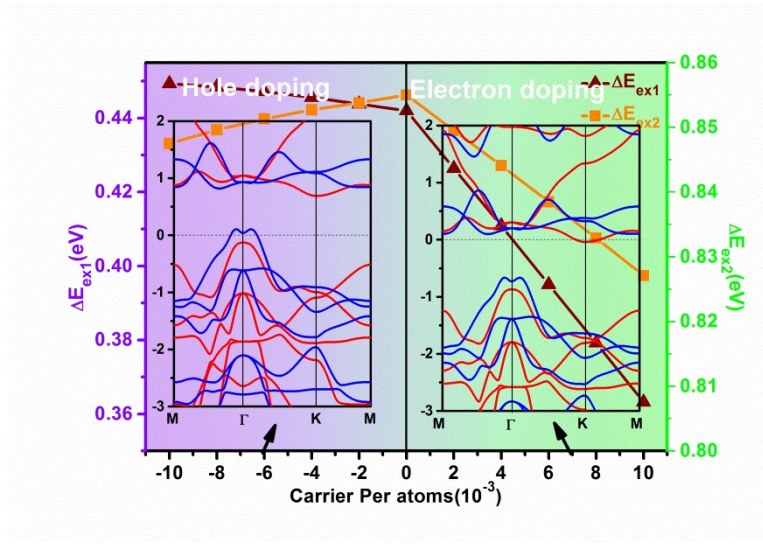

**Fig. S3.** Positive and negative values characterize the electron and hole doping in  $\text{Cr}_2\text{CHBr}$ , respectively.

The calculated band structures for electron doping and hole doping for various carrier concentrations are presented as well; red and blue lines represent the spin-up and spin-down directions, respectively.

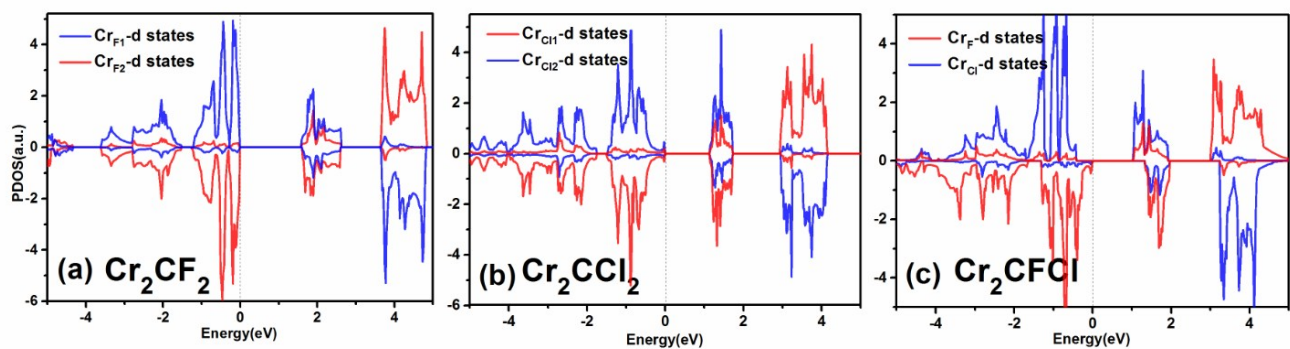

**Fig. S4.** *d* states of Cr atoms calculated for  $\text{Cr}_2\text{CF}_2$  (a),  $\text{Cr}_2\text{CCl}_2$  (b) and  $\text{Cr}_2\text{CFCl}$

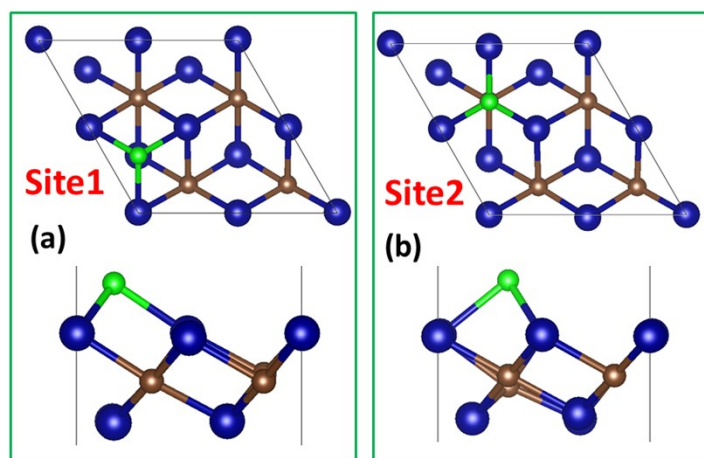

**Fig. S5.** Two possible sites for functional atoms/groups, site 1 and site 2 are shown in parts (a) and (b), respectively; top and side views are shown in upper and lower panels, respectively.

**Table S2.** Total energies of the  $\text{Cr}_8\text{C}_4\text{X}$  unit cells with functionalizing group in sites 1 or 2 calculated for  $\text{X} = \text{H}, \text{OH}, \text{F}, \text{Cl}, \text{Br}$ .

| Functional group position | Functional group |         |        |         |         |
|---------------------------|------------------|---------|--------|---------|---------|
|                           | H (eV)           | OH (eV) | F (eV) | Cl (eV) | Br (eV) |
| Site1                     | -90.88           | -99.07  | -93.12 | -91.69  | -91.16  |
| Site2                     | -90.16           | -98.53  | -92.58 | -90.17  | -90.85  |
